# Supplementary material
Source: HighWire-hosted journal article supplement (https://bmjopen.bmj.com/content/9/9/e028280)
Supplement: inline-supplementary-material-1 [file inline-supplementary-material-1.pdf]

**SUPPLEMENTARY FILE**

Article: **How effective is teamwork really? The relationship between teamwork and performance in healthcare teams: A systematic review and meta-analysis**

Jan B. Schmutz, PhD; Laurenz L. Meier, PhD; Tanja Manser, PhD

**Search terms used for PubMed search**

(Teamwork[All Fields]) OR (team[All Fields] AND coordination[All Fields]) OR (team[All Fields] AND "decision making"[All Fields]) OR ((team[All Fields] AND (communication[MeSH Terms]) OR (communication[All Fields])) OR (team[All Fields] AND leadership[All Fields]) AND (patient safety[MeSH Terms])
